# Supplementary material for: A Genome-First Approach to Estimate Prevalence of Germline Pathogenic Variants and Risk of Pancreatic Cancer in Select Cancer Susceptibility Genes
Source: MDPI journal article supplement (doi:10.3390/cancers14133257), 2022-07-02
Supplement: s1 [file s1]

**Supplementary Table S1. Germline pathogenic variants in participants with pancreatic cancer by gene and cohort**

| Gene          | DNA change             | Amino Acid change    | Variant Type      | Transcript  | Number of participants with GPV in UKB | Number of participants with GPV in GHS |
|---------------|------------------------|----------------------|-------------------|-------------|----------------------------------------|----------------------------------------|
| <i>ATM</i>    | c.1110C>G              | p.Tyr370*            | Nonsense          | NM_000051.4 | 0                                      | 1                                      |
| <i>ATM</i>    | c.1402_1403delAA       | p.Lys468fs           | Frameshift        | NM_000051.4 | 0                                      | 2                                      |
| <i>ATM</i>    | c.1564_1565delGA       | p.Glu522fs           | Frameshift        | NM_000051.4 | 0                                      | 1                                      |
| <i>ATM</i>    | c.170G>A               | p.Trp57*             | Nonsense          | NM_000051.4 | 1                                      | 0                                      |
| <i>ATM</i>    | c.2672C>G              | p.Ser891*            | Nonsense          | NM_000051.4 | 0                                      | 1                                      |
| <i>ATM</i>    | c.2849T>G              | p.Leu950Arg          | Missense          | NM_000051.4 | 1                                      | 0                                      |
| <i>ATM</i>    | c.3146dupT             | p.Leu1049fs          | Frameshift        | NM_000051.4 | 1                                      | 0                                      |
| <i>ATM</i>    | c.3802delG             | p.Val1268fs          | Frameshift        | NM_000051.4 | 2                                      | 0                                      |
| <i>ATM</i>    | c.5228C>T              | p.Thr1743Ile         | Missense          | NM_000051.4 | 1                                      | 0                                      |
| <i>ATM</i>    | c.5979_5983delTAAAG    | p.Ser1993fs          | Frameshift        | NM_000051.4 | 0                                      | 1                                      |
| <i>ATM</i>    | c.6095G>A              | p.Arg2032Lys         | Missense          | NM_000051.4 | 0                                      | 1                                      |
| <i>ATM</i>    | c.6839delA             | p.Gln2280fs          | Frameshift        | NM_000051.4 | 0                                      | 1                                      |
| <i>ATM</i>    | c.7271T>G              | p.Val2424Gly         | Missense          | NM_000051.4 | 0                                      | 1                                      |
| <i>ATM</i>    | c.7638_7646delTAGAATTC | p.Arg2547_Ser2549del | In-frame deletion | NM_000051.4 | 1                                      | 0                                      |
| <i>ATM</i>    | c.8147T>C              | p.Val2716Ala         | Missense          | NM_000051.4 | 0                                      | 1                                      |
| <i>ATM</i>    | c.8204_8205dupGT       | p.Asn2736fs          | Frameshift        | NM_000051.4 | 1                                      | 0                                      |
| <i>ATM</i>    | c.8266A>T              | p.Lys2756*           | Nonsense          | NM_000051.4 | 0                                      | 1                                      |
| <i>ATM</i>    | c.8545C>T              | p.Arg2849*           | Nonsense          | NM_000051.4 | 0                                      | 1                                      |
| <i>ATM</i>    | c.8786+1G>A            | -                    | Splicing          | NM_000051.4 | 1                                      | 0                                      |
| <i>ATM</i>    | c.8833_8834delCT       | p.Leu2945fs          | Frameshift        | NM_000051.4 | 1                                      | 0                                      |
| <i>ATM</i>    | c.9022C>T              | p.Arg3008Cys         | Missense          | NM_000051.4 | 0                                      | 1                                      |
| <i>ATM</i>    | c.9139C>T              | p.Arg3047*           | Nonsense          | NM_000051.4 | 1                                      | 0                                      |
| <i>BRCA1</i>  | c.5329dupC             | p.Gln1777fs          | Frameshift        | NM_007294.4 | 0                                      | 1                                      |
| <i>BRCA1</i>  | c.68_69delAG           | p.Glu23fs            | Frameshift        | NM_007294.4 | 0                                      | 1                                      |
| <i>BRCA1</i>  | c.1189_1190insTTAG     | p.Gln397fs           | Frameshift        | NM_000059.4 | 0                                      | 1                                      |
| <i>BRCA2</i>  | c.3158T>G              | p.Leu1053*           | Nonsense          | NM_000059.4 | 1                                      | 0                                      |
| <i>BRCA2</i>  | c.3545_3546delTT       | p.Phe1182fs          | Frameshift        | NM_000059.4 | 0                                      | 1                                      |
| <i>BRCA2</i>  | c.4103delT             | p.Leu1368fs          | Frameshift        | NM_000059.4 | 0                                      | 1                                      |
| <i>BRCA2</i>  | c.4478_4481delAAAAG    | p.Glu1493fs          | Frameshift        | NM_000059.4 | 1                                      | 0                                      |
| <i>BRCA2</i>  | c.5157_5161delTTCAA    | p.Asn1719fs          | Frameshift        | NM_000059.4 | 0                                      | 1                                      |
| <i>BRCA2</i>  | c.5303_5304delTT       | p.Leu1768fs          | Frameshift        | NM_000059.4 | 1                                      | 0                                      |
| <i>BRCA2</i>  | c.5722_5723delCT       | p.Leu1908fs          | Frameshift        | NM_000059.4 | 0                                      | 1                                      |
| <i>BRCA2</i>  | c.6998dupT             | p.Pro2334fs          | Frameshift        | NM_000059.4 | 0                                      | 1                                      |
| <i>BRCA2</i>  | c.718_719delCT         | p.Leu240fs           | Frameshift        | NM_000059.4 | 0                                      | 1                                      |
| <i>BRCA2</i>  | c.7958T>C              | p.Leu2653Pro         | Missense          | NM_000059.4 | 1                                      | 0                                      |
| <i>BRCA2</i>  | c.7977-1G>C            | -                    | Splicing          | NM_000059.4 | 0                                      | 1                                      |
| <i>BRCA2</i>  | c.8487+1G>C            | -                    | Splicing          | NM_000059.4 | 1                                      | 0                                      |
| <i>BRCA2</i>  | c.8904delC             | p.Val2969fs          | Frameshift        | NM_000059.4 | 0                                      | 1                                      |
| <i>CDKN2A</i> | c.104G>C               | p.Gly35Ala           | Missense          | NM_000077.5 | 1                                      | 0                                      |
| <i>CDKN2A</i> | c.251A>C               | p.Asp84Ala           | Missense          | NM_000077.5 | 1                                      | 0                                      |
| <i>CHEK2</i>  | c.1100delC             | p.Thr367fs           | Frameshift        | NM_007194.4 | 5                                      | 3                                      |
| <i>CHEK2</i>  | c.1368dupA             | p.Glu457fs           | Frameshift        | NM_007194.4 | 0                                      | 1                                      |
| <i>CHEK2</i>  | c.409C>T               | p.Arg137*            | Nonsense          | NM_007194.4 | 0                                      | 1                                      |
| <i>CHEK2</i>  | c.470T>C               | p.Ile157Thr          | Missense          | NM_007194.4 | 1                                      | 10                                     |
| <i>CHEK2</i>  | c.483_485delAGA        | p.Glu161del          | In-frame deletion | NM_007194.4 | 0                                      | 1                                      |
| <i>PALB2</i>  | c.2712G>A              | p.Trp904*            | Nonsense          | NM_024675.4 | 0                                      | 1                                      |
| <i>PALB2</i>  | c.2727_2728delTT       | p.Thr911fs           | Frameshift        | NM_024675.4 | 0                                      | 1                                      |
| <i>PALB2</i>  | c.2915delT             | p.Leu972fs           | Frameshift        | NM_024675.4 | 1                                      | 0                                      |
| <i>PALB2</i>  | c.3116delA             | p.Asn1039fs          | Frameshift        | NM_024675.4 | 1                                      | 0                                      |
| <i>PALB2</i>  | c.3256delC             | p.Arg1086fs          | Frameshift        | NM_024675.4 | 0                                      | 1                                      |
| <i>PALB2</i>  | c.509_510delGA         | p.Arg170fs           | Frameshift        | NM_024675.4 | 0                                      | 2                                      |

**Abbreviations:** PDAC: pancreatic ductal adenocarcinoma, GPV: germline pathogenic variant. UKB: UK Biobank; GHS: Geisinger MyCode Health Initiative.
